# Supplementary material for: Mechanical Property of Polypropylene Gels Associated with That of Molten Polypropylenes
Source: MDPI journal article supplement (doi:10.3390/gels7030099), 2021-07-23
Supplement: s1 [file s1]

# Mechanical Property of Polypropylene Gels Associated with That of Molten Polypropylenes

Tetsu Ouchi, Misuzu Yamazaki, Tomoki Maeda and Atsushi Hotta \*

Department of Mechanical Engineering, Keio University, 3-14-1, Hiyoshi, Kohoku-ku, Yokohama 223-8522, Japan; tetsu.ouchi@duke.edu (T.O.); ymisuzu332@gmail.com (M.Y.); tomoki.maeda.polymer@vc.ibaraki.ac.jp (T.M.)

\* Correspondence: hotta@mech.keio.ac.jp

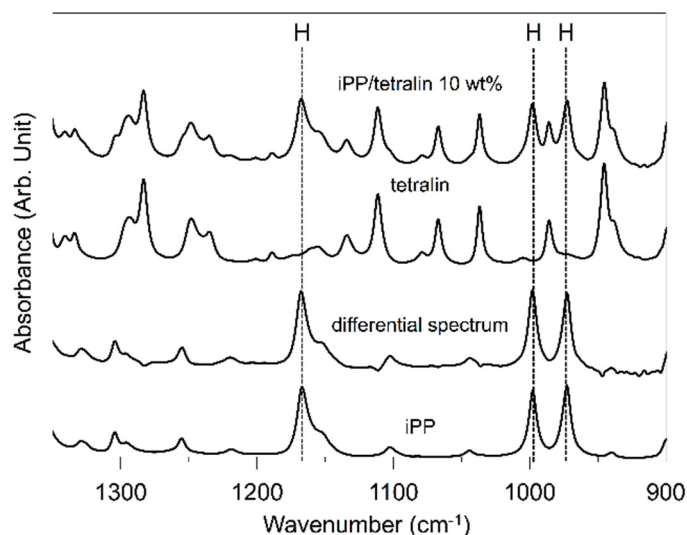

**Figure S1.** FTIR spectra of iPP/tetralin 10, tetralin, and iPP with the differential spectrum of iPP/tetralin10—tetralin. The FTIR spectrum of the differential spectrum and that of iPP were very similar, indicating the same configurations and structures in both specimens. H (973  $\text{cm}^{-1}$ ), H (998  $\text{cm}^{-1}$ ), and H (1167  $\text{cm}^{-1}$ ) represent helical (amorphous), helical ( $\alpha$  crystal), and helical ( $\alpha$  crystal), respectively.

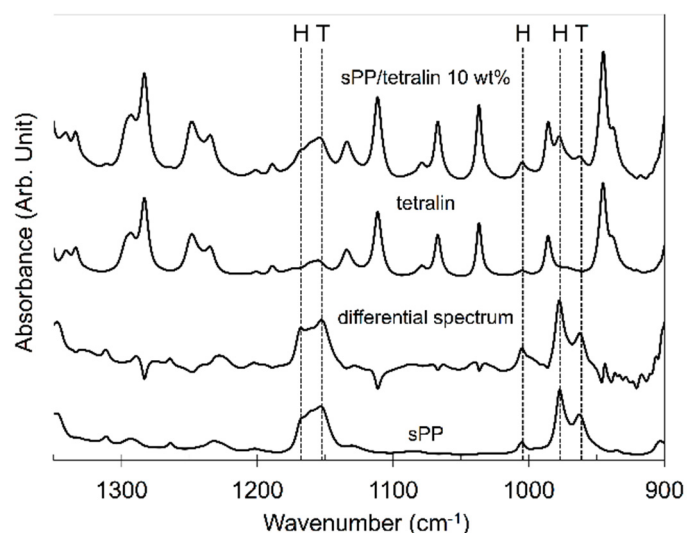

**Figure S2.** FTIR spectra of sPP/tetralin 10, tetralin, and sPP with the differential spectrum of sPP/tetralin10—tetralin. The FTIR spectrum of the differential spectrum and that of sPP looked very similar, indicating the same configurations and structures in the specimens. T (963  $\text{cm}^{-1}$ ), H (977  $\text{cm}^{-1}$ ), H (1005  $\text{cm}^{-1}$ ), T (1153  $\text{cm}^{-1}$ ), and H (1169  $\text{cm}^{-1}$ ) represent planar zigzag (interfacial), helical (interfacial), helical (Form I), planar zigzag (amorphous), and helical (amorphous), respectively.
